# Supplementary material for: Magnitude and factors associated with musculoskeletal disorder among patients with diabetes attending chronic care at Arba Minch General Hospital, Arba Minch, southern Ethiopia, 2021: a cross-sectional study
Source: PubMed Central journal article supplement — BMJ Open. 2022 Nov 7;12(11):e059218. doi: 10.1136/bmjopen-2021-059218 (PMC9644307; doi:10.1136/bmjopen-2021-059218), 2022-11-07
Supplement: bmjopen-2021-059218.reviewer_comments.pdf [file bmjopen-2021-059218.reviewer_comments.pdf]

## PEER REVIEW HISTORY

BMJ Open publishes all reviews undertaken for accepted manuscripts. Reviewers are asked to complete a checklist review form (<http://bmjopen.bmj.com/site/about/resources/checklist.pdf>) and are provided with free text boxes to elaborate on their assessment. These free text comments are reproduced below.

### ARTICLE DETAILS

|                            |                                                                                                                                                                                                            |
|----------------------------|------------------------------------------------------------------------------------------------------------------------------------------------------------------------------------------------------------|
| <b>TITLE (PROVISIONAL)</b> | Magnitude and Factors Associated with Musculoskeletal Disorder Among Diabetic Patients Attending Chronic Care at Arba Minch General Hospital, Arba Minch, Southern Ethiopia, 2021: A Cross-Sectional Study |
| <b>AUTHORS</b>             | Abebe, Getachew; Hailu, Tadiwos; Gebabo, Teshale; Gebremickael, Abinet; Temesgen, Rodas; Shibru, Tamiru; Kefelew, Etenesh; Dawit, Firehiwot; Atnafu, Kaleb; wale, wondweson; Bekele, Alehegn               |

### VERSION 1 – REVIEW

|                        |                                           |
|------------------------|-------------------------------------------|
| <b>REVIEWER</b>        | Başaran, Nursel<br>Hacettepe Universitesi |
| <b>REVIEW RETURNED</b> | 09-Feb-2022                               |

|                         |                                                                                                                                                                                                                                                                                                                                                                                                                                                                                                                                                                                                       |
|-------------------------|-------------------------------------------------------------------------------------------------------------------------------------------------------------------------------------------------------------------------------------------------------------------------------------------------------------------------------------------------------------------------------------------------------------------------------------------------------------------------------------------------------------------------------------------------------------------------------------------------------|
| <b>GENERAL COMMENTS</b> | Musculoskeletal disorders in DM unfortunately overlooked, so this study is important to show the prevalence, however this numbers represents the local situation.<br>1) I understood that the presence of musculoskeletal disorders were based on medical records and self-reports. This can be emphasized accurately.<br>2) There are several spelling errors on text and table legends.<br>3) English edition should be made.<br>4) Limitations should be discussed.<br>5) In Discussion MSK/MSKD/MSD had been used, I recommend to choose one of them and follow the rules of using abbreviations. |
|-------------------------|-------------------------------------------------------------------------------------------------------------------------------------------------------------------------------------------------------------------------------------------------------------------------------------------------------------------------------------------------------------------------------------------------------------------------------------------------------------------------------------------------------------------------------------------------------------------------------------------------------|

|                        |                                        |
|------------------------|----------------------------------------|
| <b>REVIEWER</b>        | Mirghani, Hyder<br>University of Tabuk |
| <b>REVIEW RETURNED</b> | 28-Mar-2022                            |

|                         |                                                                                                                                                                                                                                                                                                                                                                                                                                                                                |
|-------------------------|--------------------------------------------------------------------------------------------------------------------------------------------------------------------------------------------------------------------------------------------------------------------------------------------------------------------------------------------------------------------------------------------------------------------------------------------------------------------------------|
| <b>GENERAL COMMENTS</b> | The topic is of interest<br>I suggest removing the first paragraph on page 10 in the discussion, from line 3-10.<br>The explanation regarding the impact of education is not acceptable and no citation, please provide more explanations.<br>The references need revision and some are nearly 30 years back, please refresh.<br>Although, the manuscript adds nothing to the current literature. However, it gave an insight from low-income country and needs consideration. |
|-------------------------|--------------------------------------------------------------------------------------------------------------------------------------------------------------------------------------------------------------------------------------------------------------------------------------------------------------------------------------------------------------------------------------------------------------------------------------------------------------------------------|

|                        |                                               |
|------------------------|-----------------------------------------------|
| <b>REVIEWER</b>        | Cai, Jingheng<br>Sun Yat Sen Univ, Statistics |
| <b>REVIEW RETURNED</b> | 17-Jun-2022                                   |

|                         |                                                                                                                                                                                                                                                                                                                                                                                                                                                                                                                                                                                                                                                                                                               |
|-------------------------|---------------------------------------------------------------------------------------------------------------------------------------------------------------------------------------------------------------------------------------------------------------------------------------------------------------------------------------------------------------------------------------------------------------------------------------------------------------------------------------------------------------------------------------------------------------------------------------------------------------------------------------------------------------------------------------------------------------|
| <b>GENERAL COMMENTS</b> | <p>Given that I am not an expert in the medical field. I only comment on the statistical methods employed in the manuscript.</p> <p>In general, the authors employed odds ratio to assess the relationships of musculoskeletal disorders and its related factors one by one. However, the concepts and the related results are not presented clearly. More specifically, what are the definitions of COR and AOR in Table 4? Moreover, odds ratios are only able to examined the associations of musculoskeletal disorders and its related factors one by one. Is it possible to consider the effects of potential factors simultaneously by more rigorous statistical models (e.g. logistic regression)?</p> |
|-------------------------|---------------------------------------------------------------------------------------------------------------------------------------------------------------------------------------------------------------------------------------------------------------------------------------------------------------------------------------------------------------------------------------------------------------------------------------------------------------------------------------------------------------------------------------------------------------------------------------------------------------------------------------------------------------------------------------------------------------|

### VERSION 1 – AUTHOR RESPONSE

Reviewer: 1

Comments to the Author:

1. There are several spelling errors on text and table legends. English edition should be made.

Response: Thank you for your comment. We agree that there were errors in spelling and grammar. We have gone through a detailed review and grammar software and improved such errors.

2. Limitations should be discussed

Response: Thank you for your comment. limitation of the study was discussed on page 2 next to the abstract based on the journal's guidelines.

3. In Discussion MSK/MSKD/MSD had been used, I recommend to choose one of them and follow the rules of using abbreviations.

Response: Thank you for your comments again. We have corrected all and we use MSD throughout the document.

Reviewer: 2

Comments to the Author:

1. I suggest removing the first paragraph on page 10 in the discussion, from line 3-10.

Response: Thank you for your comment and I believe your comments have improved our article. I have removed first paragraph on page 10 in the discussion, from lines 3-10 from the document.

2. The explanation regarding the impact of education is not acceptable and no citation, please provide more explanations.

Response: Thank you for your comment. We have added more explanations and citations were added.

3. The references need revision and some are nearly 30 years back, please refresh.

Response: Thank you for your comment. The references have been updated to the latest possible sources.

Reviewer: 3

Comments to the Author:

1. In general, the author's employed odds ratio to assess the relationships of musculoskeletal disorders and its related factors one by one. However, the concepts and the related results are not presented clearly. More specifically, what are the definitions of COR and AOR in Table 4? Moreover, odds ratios are only able to examined the associations of musculoskeletal disorders and its related factors one by one. Is it possible to consider the effects of potential factors simultaneously by more rigorous statistical models (e.g. logistic regression)?

Response: Thank you for your comments which improve our manuscript. we have added sentences to the data processing and a paragraph in the result section on the subtitle "Factors associated with musculoskeletal disorders" which we believe better describes the concepts and the related results. Foote note is added to table 4 which defines COR and AOR. It is not possible to consider the effect of potential factors using a crosssectional study. Rather we showed the presence or absence of association between the dependant and independent variables. We have to do an experimental study to consider the effects of potential f

**VERSION 2 – REVIEW**

|                        |                                               |
|------------------------|-----------------------------------------------|
| <b>REVIEWER</b>        | Cai, Jingheng<br>Sun Yat Sen Univ, Statistics |
| <b>REVIEW RETURNED</b> | 27-Jul-2022                                   |

|                         |                                                               |
|-------------------------|---------------------------------------------------------------|
| <b>GENERAL COMMENTS</b> | My comments have been addressed. Thank you for the responses. |
|-------------------------|---------------------------------------------------------------|
