# Supplementary material for: Magnitude and factors associated with musculoskeletal disorder among patients with diabetes attending chronic care at Arba Minch General Hospital, Arba Minch, southern Ethiopia, 2021: a cross-sectional study
Source: PubMed Central journal article supplement — BMJ Open. 2022 Nov 7;12(11):e059218. doi: 10.1136/bmjopen-2021-059218 (PMC9644307; doi:10.1136/bmjopen-2021-059218), 2022-11-07
Supplement: bmjopen-2021-059218supp001.pdf [file bmjopen-2021-059218supp001.pdf]

NAME: \_\_\_\_\_ DOB: \_\_\_\_\_

DATE: \_\_\_\_\_

## Short Musculoskeletal Function Assessment

To be completed by the PATIENT

SCORE:    DYSFUNCTION INDEX: \_\_\_\_\_ %    Previous: \_\_\_\_\_ %    Date: \_\_\_\_\_

BOTHER INDEX: \_\_\_\_\_ %    Previous: \_\_\_\_\_ %    Date: \_\_\_\_\_

These questions are about how much difficulty you may be having this week with your daily activities because of your injury or arthritis.

|                                                                                                                                                | Not at all<br>difficult | A little<br>difficult | Moderately<br>difficult | Very<br>difficult     | Unable<br>to do       |
|------------------------------------------------------------------------------------------------------------------------------------------------|-------------------------|-----------------------|-------------------------|-----------------------|-----------------------|
| 01. How difficult is it for you to get in or out of a low chair?                                                                               | <input type="radio"/>   | <input type="radio"/> | <input type="radio"/>   | <input type="radio"/> | <input type="radio"/> |
| 02. How difficult is it for you to open medicine bottles or jars?                                                                              | <input type="radio"/>   | <input type="radio"/> | <input type="radio"/>   | <input type="radio"/> | <input type="radio"/> |
| 03. How difficult is it for you to shop for groceries or other things?                                                                         | <input type="radio"/>   | <input type="radio"/> | <input type="radio"/>   | <input type="radio"/> | <input type="radio"/> |
| 04. How difficult is it for you to climb stairs?                                                                                               | <input type="radio"/>   | <input type="radio"/> | <input type="radio"/>   | <input type="radio"/> | <input type="radio"/> |
| 05. How difficult is it for you to make a tight fist?                                                                                          | <input type="radio"/>   | <input type="radio"/> | <input type="radio"/>   | <input type="radio"/> | <input type="radio"/> |
| 06. How difficult is it for you to get in or out of the bathtub or shower?                                                                     | <input type="radio"/>   | <input type="radio"/> | <input type="radio"/>   | <input type="radio"/> | <input type="radio"/> |
| 07. How difficult is it for you to get comfortable to sleep?                                                                                   | <input type="radio"/>   | <input type="radio"/> | <input type="radio"/>   | <input type="radio"/> | <input type="radio"/> |
| 08. How difficult is it for you to bend or kneel down?                                                                                         | <input type="radio"/>   | <input type="radio"/> | <input type="radio"/>   | <input type="radio"/> | <input type="radio"/> |
| 09. How difficult is it for you to use buttons, snaps, hooks, or zippers?                                                                      | <input type="radio"/>   | <input type="radio"/> | <input type="radio"/>   | <input type="radio"/> | <input type="radio"/> |
| 10. How difficult is it for you to cut your own fingernails?                                                                                   | <input type="radio"/>   | <input type="radio"/> | <input type="radio"/>   | <input type="radio"/> | <input type="radio"/> |
| 11. How difficult is it for you to dress yourself?                                                                                             | <input type="radio"/>   | <input type="radio"/> | <input type="radio"/>   | <input type="radio"/> | <input type="radio"/> |
| 12. How difficult is it for you to walk?                                                                                                       | <input type="radio"/>   | <input type="radio"/> | <input type="radio"/>   | <input type="radio"/> | <input type="radio"/> |
| 13. How difficult is it for you to get moving after you have been sitting or lying down?                                                       | <input type="radio"/>   | <input type="radio"/> | <input type="radio"/>   | <input type="radio"/> | <input type="radio"/> |
| 14. How difficult is it for you to go out by yourself?                                                                                         | <input type="radio"/>   | <input type="radio"/> | <input type="radio"/>   | <input type="radio"/> | <input type="radio"/> |
| 15. How difficult is it for you to drive?                                                                                                      | <input type="radio"/>   | <input type="radio"/> | <input type="radio"/>   | <input type="radio"/> | <input type="radio"/> |
| 16. How difficult is it for you to clean yourself after going to the bathroom?                                                                 | <input type="radio"/>   | <input type="radio"/> | <input type="radio"/>   | <input type="radio"/> | <input type="radio"/> |
| 17. How difficult is it for you turn knobs or levers, for example, open doors, roll down car windows?                                          | <input type="radio"/>   | <input type="radio"/> | <input type="radio"/>   | <input type="radio"/> | <input type="radio"/> |
| 18. How difficult is it for you to write or type?                                                                                              | <input type="radio"/>   | <input type="radio"/> | <input type="radio"/>   | <input type="radio"/> | <input type="radio"/> |
| 19. How difficult is it for you to pivot?                                                                                                      | <input type="radio"/>   | <input type="radio"/> | <input type="radio"/>   | <input type="radio"/> | <input type="radio"/> |
| 20. How difficult is it for you to do your usual physical recreational activities, such as bicycling, jogging, or walking?                     | <input type="radio"/>   | <input type="radio"/> | <input type="radio"/>   | <input type="radio"/> | <input type="radio"/> |
| 21. How difficult is it for you to do your usual leisure activities, such as hobbies, crafts, gardening, card playing, going out with friends? | <input type="radio"/>   | <input type="radio"/> | <input type="radio"/>   | <input type="radio"/> | <input type="radio"/> |
| 22. How much difficulty are you having with sexual activity?                                                                                   | <input type="radio"/>   | <input type="radio"/> | <input type="radio"/>   | <input type="radio"/> | <input type="radio"/> |
| 23. How difficult is it for you to do <u>light</u> housework <u>or</u> yardwork, such as dusting, washing dishes, or watering plants?          | <input type="radio"/>   | <input type="radio"/> | <input type="radio"/>   | <input type="radio"/> | <input type="radio"/> |
| 24. How difficult is it for you to do <u>heavy</u> housework <u>or</u> yardwork, such as washing floors, vacuuming, or mowing lawns?           | <input type="radio"/>   | <input type="radio"/> | <input type="radio"/>   | <input type="radio"/> | <input type="radio"/> |
| 25. How difficult is it for you to do your usual work, such as a paid job, housework, volunteer activities?                                    | <input type="radio"/>   | <input type="radio"/> | <input type="radio"/>   | <input type="radio"/> | <input type="radio"/> |

Please continue on next page

NAME: \_\_\_\_\_ DOB: \_\_\_\_\_

DATE: \_\_\_\_\_

## Short Musculoskeletal Function Assessment

To be completed by the PATIENT

These next questions ask how often you are experiencing problems this week because of your injury or arthritis

|                                                                                                                                   | <u>None of<br/>the time</u> | <u>A little of<br/>the time</u> | <u>Some of<br/>the time</u> | <u>Most of<br/>the time</u> | <u>All of the<br/>time</u> |
|-----------------------------------------------------------------------------------------------------------------------------------|-----------------------------|---------------------------------|-----------------------------|-----------------------------|----------------------------|
| 26. How often do you walk with a limp?                                                                                            | <input type="radio"/>       | <input type="radio"/>           | <input type="radio"/>       | <input type="radio"/>       | <input type="radio"/>      |
| 27. How often do you avoid using your painful limb(s) or back?                                                                    | <input type="radio"/>       | <input type="radio"/>           | <input type="radio"/>       | <input type="radio"/>       | <input type="radio"/>      |
| 28. How often does your leg lock or give-way?                                                                                     | <input type="radio"/>       | <input type="radio"/>           | <input type="radio"/>       | <input type="radio"/>       | <input type="radio"/>      |
| 29. How often do you have problems with concentration?                                                                            | <input type="radio"/>       | <input type="radio"/>           | <input type="radio"/>       | <input type="radio"/>       | <input type="radio"/>      |
| 30. How often does doing too much in one day affect what you do the next day?                                                     | <input type="radio"/>       | <input type="radio"/>           | <input type="radio"/>       | <input type="radio"/>       | <input type="radio"/>      |
| 31. How often do you act irritable toward those around you, for example, snap at people, give sharp answers, or criticize easily? | <input type="radio"/>       | <input type="radio"/>           | <input type="radio"/>       | <input type="radio"/>       | <input type="radio"/>      |
| 32. How often are you tired?                                                                                                      | <input type="radio"/>       | <input type="radio"/>           | <input type="radio"/>       | <input type="radio"/>       | <input type="radio"/>      |
| 33. How often do you feel disabled?                                                                                               | <input type="radio"/>       | <input type="radio"/>           | <input type="radio"/>       | <input type="radio"/>       | <input type="radio"/>      |
| 34. How often do you feel angry or frustrated that you have this injury or arthritis?                                             | <input type="radio"/>       | <input type="radio"/>           | <input type="radio"/>       | <input type="radio"/>       | <input type="radio"/>      |

These next questions are about how much you are bothered by problems you are having this week due to your injury or arthritis

| How much are you bothered by:                                                  | <u>Not bothered<br/>at all</u> | <u>A little<br/>bothered</u> | <u>Moderately<br/>bothered</u> | <u>Very<br/>bothered</u> | <u>Extremely<br/>bothered</u> |
|--------------------------------------------------------------------------------|--------------------------------|------------------------------|--------------------------------|--------------------------|-------------------------------|
| 35. Problems using your hands?                                                 | <input type="radio"/>          | <input type="radio"/>        | <input type="radio"/>          | <input type="radio"/>    | <input type="radio"/>         |
| 36. Problems using your back?                                                  | <input type="radio"/>          | <input type="radio"/>        | <input type="radio"/>          | <input type="radio"/>    | <input type="radio"/>         |
| 37. Problems doing work around your home?                                      | <input type="radio"/>          | <input type="radio"/>        | <input type="radio"/>          | <input type="radio"/>    | <input type="radio"/>         |
| 38. Problems with bathing, dressing, toileting or other personal care?         | <input type="radio"/>          | <input type="radio"/>        | <input type="radio"/>          | <input type="radio"/>    | <input type="radio"/>         |
| 39. Problems with sleep and rest?                                              | <input type="radio"/>          | <input type="radio"/>        | <input type="radio"/>          | <input type="radio"/>    | <input type="radio"/>         |
| 40. Problems with leisure or recreational activities?                          | <input type="radio"/>          | <input type="radio"/>        | <input type="radio"/>          | <input type="radio"/>    | <input type="radio"/>         |
| 41. Problems with your friends, family or other important people in your life? | <input type="radio"/>          | <input type="radio"/>        | <input type="radio"/>          | <input type="radio"/>    | <input type="radio"/>         |
| 42. Problems with thinking, concentrating or remembering?                      | <input type="radio"/>          | <input type="radio"/>        | <input type="radio"/>          | <input type="radio"/>    | <input type="radio"/>         |
| 43. Problems adjusting or coping with your injury or arthritis?                | <input type="radio"/>          | <input type="radio"/>        | <input type="radio"/>          | <input type="radio"/>    | <input type="radio"/>         |
| 44. Problems doing your usual work?                                            | <input type="radio"/>          | <input type="radio"/>        | <input type="radio"/>          | <input type="radio"/>    | <input type="radio"/>         |
| 45. Problems with feeling dependent on others?                                 | <input type="radio"/>          | <input type="radio"/>        | <input type="radio"/>          | <input type="radio"/>    | <input type="radio"/>         |
| 46. Problems with stiffness and pain?                                          | <input type="radio"/>          | <input type="radio"/>        | <input type="radio"/>          | <input type="radio"/>    | <input type="radio"/>         |

Reproduced from: Marc F. Swionkowski, M.D.; Ruth Engelberg, Ph.D.; Diane P. Martin, Ph.D.; and Julie Agel, M.A. Short Musculoskeletal Function Assessment Questionnaire: Validity, Reliability, Responsiveness. *J Bone Joint Surg AM* 81:1245-60, 1999.
