# Supplementary material for: Magnitude and factors associated with musculoskeletal disorder among patients with diabetes attending chronic care at Arba Minch General Hospital, Arba Minch, southern Ethiopia, 2021: a cross-sectional study
Source: PubMed Central journal article supplement — BMJ Open. 2022 Nov 7;12(11):e059218. doi: 10.1136/bmjopen-2021-059218 (PMC9644307; doi:10.1136/bmjopen-2021-059218), 2022-11-07
Supplement: bmjopen-2021-059218supp002.pdf [file bmjopen-2021-059218supp002.pdf]

## I. SCORE VALUES

|                    |                      |   |
|--------------------|----------------------|---|
| A. Questions 1-25: | Not at all difficult | 1 |
|                    | A little difficult   | 2 |
|                    | Moderately difficult | 3 |
|                    | Very difficult       | 4 |
|                    | Unable to do         | 5 |
| B. Questions 26-34 | None of the time     | 1 |
|                    | A little of the time | 2 |
|                    | Some of the time     | 3 |
|                    | Most of the time     | 4 |
|                    | All of the time      | 5 |
| C. Questions 35-46 | Not at all bothered  | 1 |
|                    | A little bothered    | 2 |
|                    | Moderately bothered  | 3 |
|                    | Very bothered        | 4 |
|                    | Extremely bothered   | 5 |

## II. HANDLING OF MISSING RESPONSES

### A. Questions 1-34:

If patients have fewer than 50% of the answers missing in any one category, substitute the mean value of that category for the missing item(s). Please see the attached form identifying items and categories for this portion of the analysis.

### B. Questions 35-46 (Bothersome Index):

Patients with missing answers are omitted from the analyses of the Bother

### III. CALCULATION OF SCORES

A. Raw scores are created by summing items 1-34 for the Function Index and items 35-46 for the Bothersome Index, after corrections and omissions for missing values (see above); raw scores for categories are created by summing the items within each category.

B. Scores are standardized, with high scores indicating poor function and low scores indicating good function. The formula for standardization is:  
$$(\text{Actual raw score} - \text{lowest possible raw score}) / (\text{possible raw score range}) * 100$$

C. Below are listed the values to be used for standardization:

1. Daily Activities Category:

$$((\text{raw summed score for daily activities items} - 10) / 40) * 100$$

2. Emotional Status Category:

$$((\text{raw summed score for emotional status items} - 7) / 28) * 100$$

3. Arm and Hand Function Category:

$$((\text{raw summed score for arm and hand function items} - 8) / 32) * 100$$

4. Mobility Category:

$$((\text{raw summed score for mobility items} - 9) / 36) * 100.$$

5. Function Index:

$$((\text{raw summed score for items 1-34} - 34) / 136) * 100$$

6. Bothersome Index:

$$((\text{raw summed score for items 35-46} - 12) / 48) * 100$$
